# Supplementary material for: Photodegradation of tetrabromobisphenol S (TBBPS) in regional surface water: direct and indirect processes impacting by dissolved organic matter (DOM) and chloride
Source: Research Square preprint supplement (doi:10.21203/rs.3.rs-7722225/v1), 2025-10-17
Supplement: Supplementary file 1 [file a91bdb7fcccfb7f0ec802590.docx]

Tables

Table 1 Effect of different quenchers on TBBPS (10 mg·L-1) photodegradation in samples

Table 2 Kinetic parameters and shielding factors of DOM on TBBPS photodegradation

Table 3 Predicting the ecotoxicity of TBBPS and its photolysis products

Table 1 Effect of different quenchers on TBBPS (10 mg·L-1) photodegradation in samples

| Concentration | quencher | Kinetic equation | R2 | Contribution *R*(%) |
| --- | --- | --- | --- | --- |
| Pure water | - | ln(Ct/C0) = -0.01272t-0.00298 | 0.9990 | - |
| IPA | ln(Ct/C0) = -0.01039t+0.00808 | 0.9982 | 18.3 |
| NaN3 | ln(Ct/C0) = -0.00859t+0.01296 | 0.9964 | 14.2 |
| SA | ln(Ct/C0)= -0.00621t+0.00538 | 0.9894 | 37.7 |
| TB | ln(Ct/C0) = -0.00929t+0.02953 | 0.9969 | 27.0 |
| HA  (1 mg·L-1) | - | ln(Ct/C0) = -0.00808t-0.03096 | 0.9975 |  |
| IPA | ln(Ct/C0) = -0.00731t-0.06110 | 0.9869 | 9.5 |
| NaN3 | ln(Ct/C0) = -0.00644t-0.00639 | 0.9969 | 10.8 |
| SA | ln(Ct/C0) = -0.00552t-0.00501 | 0.9983 | 20.9 |
| FA  (1 mg·L-1) | - | ln(Ct/C0) = -0.01373t+0.00070 | 0.9996 | -- |
| IPA | ln(Ct/C0) = -0.01006t+0.01282 | 0.9988 | 26.7 |
| NaN3 | ln(Ct/C0) = -0.00751t-0.01131 | 0.9986 | 18.6 |
| SA | ln(Ct/C0) = -0.00523t-0.00462 | 0.9975 | 43.3 |
| Cl  (1.71 mmol·L-1) | - | ln(Ct/C0) = -0.02130t+0.03588 | 0.9982 | - |
| IPA | ln(Ct/C0) = -0.01866t+0.12854 | 0.9865 | 12.4 |
| NaN3 | ln(Ct/C0) = -0.01546t-0.02977 | 0.9840 | 15.0 |
| SA | ln(Ct/C0) = -0.01097t-0.01763 | 0.9928 | 33.5 |
| TB | ln(Ct/C0) = -0.01198t+0.04187 | 0.9964 | 38.4 |
| Cl  (68.4 mmol·L-1) | - | ln(Ct/C0) = -0.00890t-0.00030 | 0.9997 | - |
| IPA | ln(Ct/C0) = -0.00810t-0.00459 | 0.9983 | 9.0 |
| NaN3 | ln(Ct/C0) = -0.00682t-0.00205 | 0.9979 | 14.4 |
| SA | ln(Ct/C0) = -0.00548t-0.03492 | 0.9840 | 24.0 |
| TB | ln(Ct/C0) = -0.00529t-0.02534 | 0.9788 | 35.4 |

Table 2 Kinetic parameters and shielding factors of DOM on TBBPS photodegradation

|  | *C*/mgC·L-1 | *k*obs/min-1 | *ΣS*λ | *k*0*ΣS*λ/min-1 | *k*in/min-1 | S/% |
| --- | --- | --- | --- | --- | --- | --- |
| HA | 0 | 0.01272 | -- | -- | -- | -- |
| 0.01 | 0.01200 | 0.82 | 0.01047 | 0.0015 | 100.0 |
| 1 | 0.00898 | 0.80 | 0.01020 | -0.00212 | 68.0 |
| 10 | 0.00726 | 0.66 | 0.00843 | -0.00117 | 79.2 |
| 50 | 0.00375 | 0.35 | 0.00440 | -0.00065 | 92.1 |
| FA | 0.01 | 0.01580 | 0.82 | 0.01049 | 0.0045 | -- |
| 1 | 0.01373 | 0.82 | 0.01043 | 0.0033 | -- |
| 10 | 0.01080 | 0.78 | 0.00998 | 0.00057 | 100.0 |
| 50 | 0.00523 | 0.66 | 0.00839 | -0.00316 | 57.8 |

Table 3 Predicting the ecotoxicity of TBBPS and its photolysis products

| Molecular structure | No. | Log *K*ow | LC50  (Fish 96h) | LC50  (Daphnia 48h) | EC50  (Gree Algae 96h) |
| --- | --- | --- | --- | --- | --- |
|  | TBBPS | 5.2066 | 0.373 | 0.817 | 0.977 |
|  | P1 | -1.2354 | 1.22×104 | 3.46×105 | 700 |
|  | P2 | 0.1348 | 8.67×103 | 1.62×103 | 711 |
|  | P3 | 1.5762 | 34.6 | 321 | 10.5 |
|  | P4 | 2.9464 | 6.20 | 33.4 | 4.25 |
|  | P5 | 2.4662 | 12.4 | 81.0 | 6.41 |
|  | P6 | 3.8364 | 2.17 | 8.19 | 2.52 |
|  | P7 | 4.3166 | 1.09 | 3.39 | 1.68 |
|  | P8 | 3.9857 | 3.17 | 6.75 | 2.47 |
|  | P9 | 2.5779 | 4.09 | 4.79 | 3.29 |
|  | P10 | 0.1022 | 4.37×103 | 1.15×103 | 571 |
